# Supplementary material for: Re-Analysis of 16S Amplicon Sequencing Data Reveals Soil Microbial Population Shifts in Rice Fields under Drought Condition
Source: PubMed Central journal article supplement (PMC7332601; doi:10.1186/s12284-020-00403-6), 2020-07-02

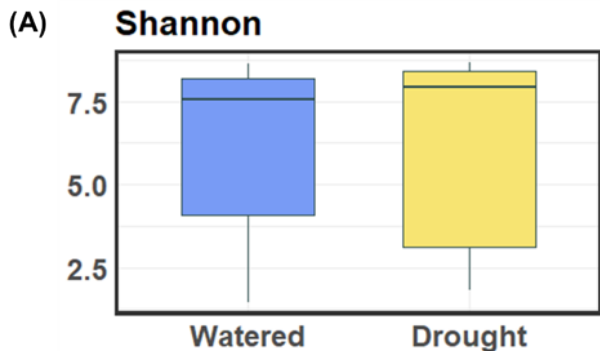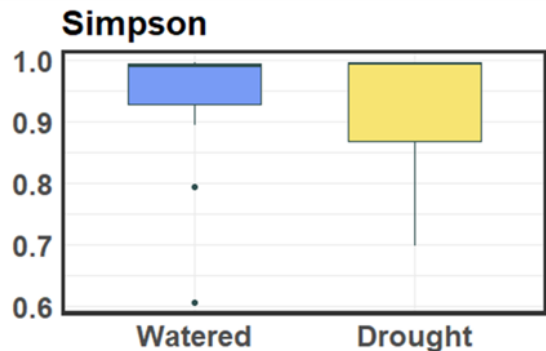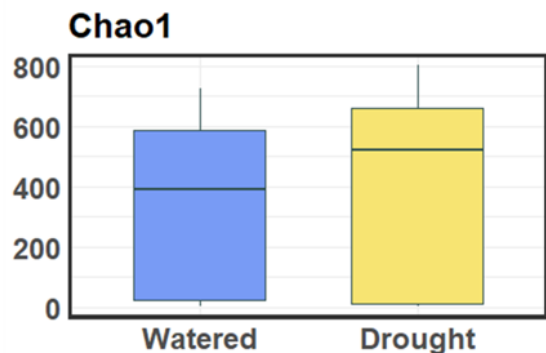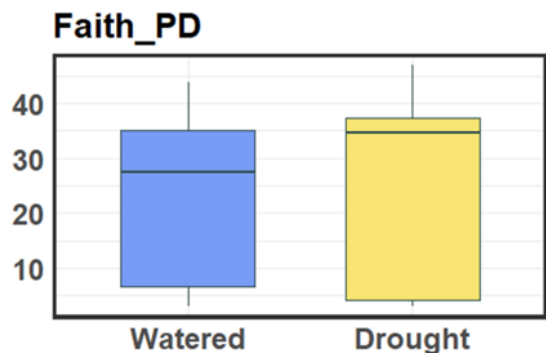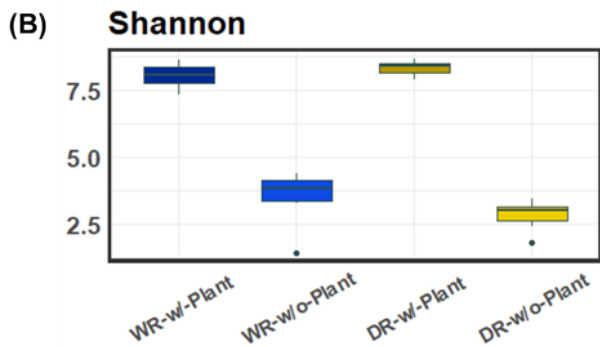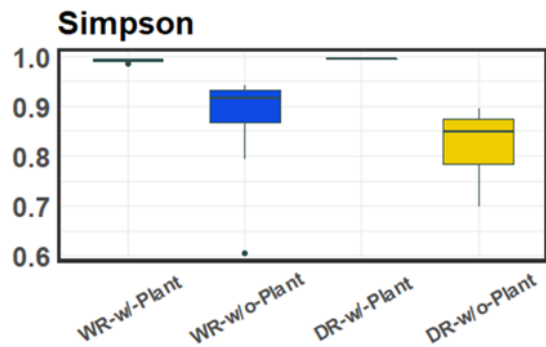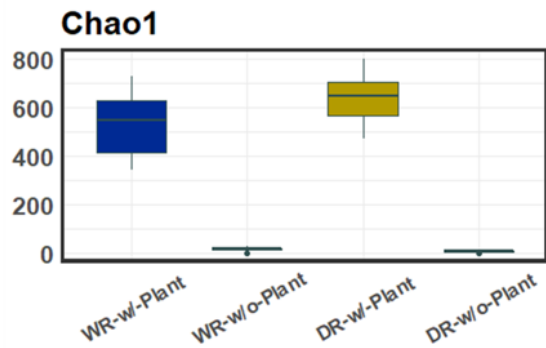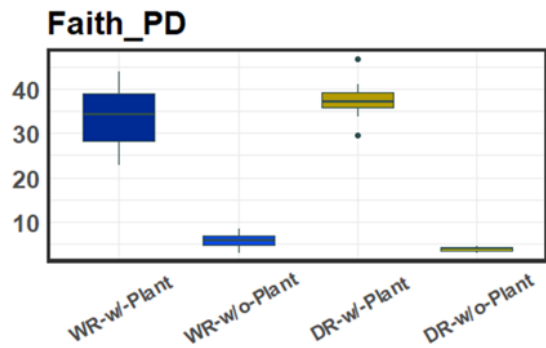

Supplement: 12284_2020_403_MOESM2_ESM.pdf [file 12284_2020_403_MOESM2_ESM.pdf]
